# Supplementary material for: Facile synthesis of phase-pure FeCr2Se4 and FeCr2S4 nanocrystals via a wet chemistry method
Source: Royal Society of Chemistry journal article supplement (doi:10.1039/c3tc32453b), 2014-01-01
Supplement: c3tc32453b1.pdf [file c3tc32453b1.pdf]

## *Supporting information*

### ***A facile synthesis of phase-pure $\text{FeCr}_2\text{Se}_4$ and $\text{FeCr}_2\text{S}_4$ nanocrystals via wet chemistry method***

Xiang Mao, Jaebeom Lee\*

Department of Nano Fusion Engineering, and Cogno-Mechatronics  
Engineering, Pusan National University, Busan 609-735, Republic of  
Korea

Corresponding author: [jaebeam@pusan.ac.kr](mailto:jaebeam@pusan.ac.kr)

### Conductivity mechanism:

A simplified expression of conductivity can be obtained by converting the previous equation. As shown in Debye's isotropic continuum model,<sup>1-3</sup> the resulting expression is:

$$I = H^2 Q_d^5 / 6\pi^2 K_b T^2 \sum_s^4 (C_s^4) \int_0^1 dx x^4 \Gamma \bar{n} (\bar{n} + 1) \quad (1)$$

In equation (1), where  $x = Q/Q_d$  and  $\Gamma$  and  $\bar{n}$  understood as functions of  $x$ ,  $T$  and

polarization  $s$ . The total relaxation is  $\Gamma_{qs}^{-1} = \sum \Gamma_{qs}^{-1}(i)$ , with  $\Gamma_{qs}^{-1}(i)$  being the

relaxation due to the phonon mechanism. The conductivity can be approximate as:

$$I = (H^2 / 3N_0 \Omega K_B T^2) \sum_{qs}^0 \sigma C_s^2(q) \omega^2(qs) \tau(qs) n_{qs} (n_{qs} + 1) \quad (2)$$

$$\sigma = \lambda_L / L * T \quad (3-1)$$

$$\Delta \Omega = \Delta W * V * L_s^{1/2} / W * V = \Delta W * L_s^{1/2} / W \quad (3-2)$$

In equation (2), provided reasonable forms of the phonon-dispersion relation  $\omega = \omega(qs)$  and relaxation time  $\tau(qs)$  are chosen, it should be straightforward to be proved by the conductivity of a crystal lattice contribution ( $\lambda_L$ ). The nature of conductivity is dependent on the NCs's  $\lambda_L$ , where  $L$  is the Lorenz factor,  $\sigma$  stands for the extent of NCs' crystallization;  $T$  is the temperature value in conductivity measurements (3-1).

The related resistivity  $\Delta \Omega$  which is dependent on the NCs' size parameter ( $L_s$ ), where  $\Delta W$  is the increase over the crystal resistivity  $W$ ,  $L_s$  is the average grain size,  $V$  is the volume of NCs (3-2).

### *References:*

- [1] Sun, Y.; Rogers, J. A. Inorganic semiconductors for flexible electronic. *Adv Mater.* 2007, **19**, 1897.
- [2] Watari, K.; Shinde, S. L. High thermal conductivity materials. *MRS Bulletin.* 2001, **26**, 440.

[3] Watari, K.; Hirao, K.; Toriyama, M.; Ishizaki, K. Effect of grain size on the thermal conductivity of  $\text{Si}_3\text{N}_4$ . *J. Am. Ceram. Soc.* 1999, **82**, 777.

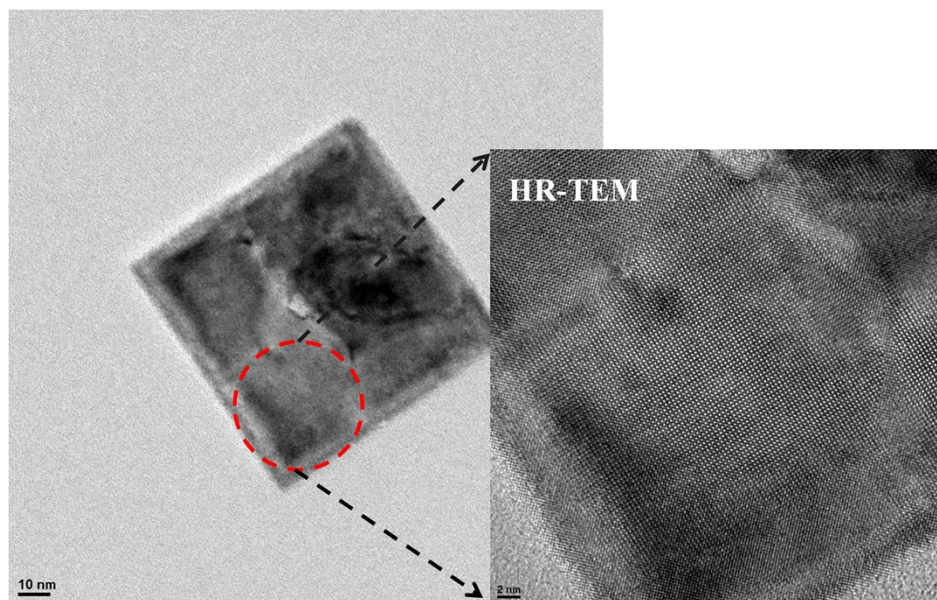

Figure S1: The TEM and HR-TEM images of single  $\text{FeCr}_2\text{Se}_4$  NCs. Inserted scale bars are 10nm and 2nm, respectively.

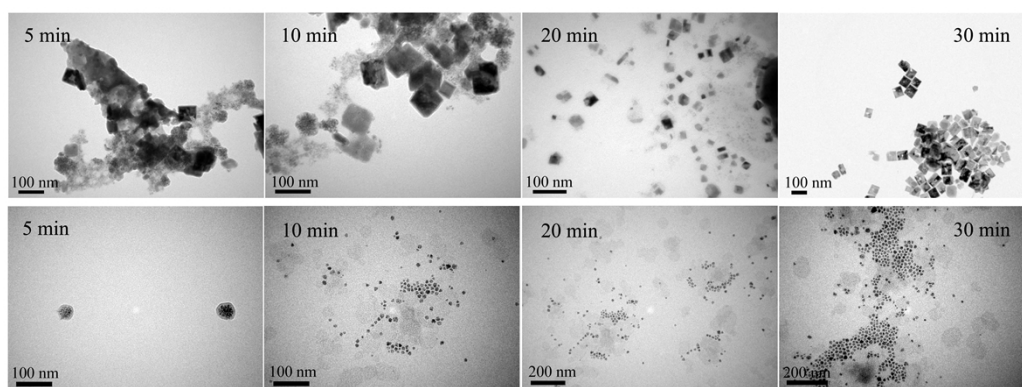

Figure S2: The TEM images of growth process:  $\text{FeCr}_2\text{Se}_4$  (up) and  $\text{FeCr}_2\text{S}_4$  (bottom).

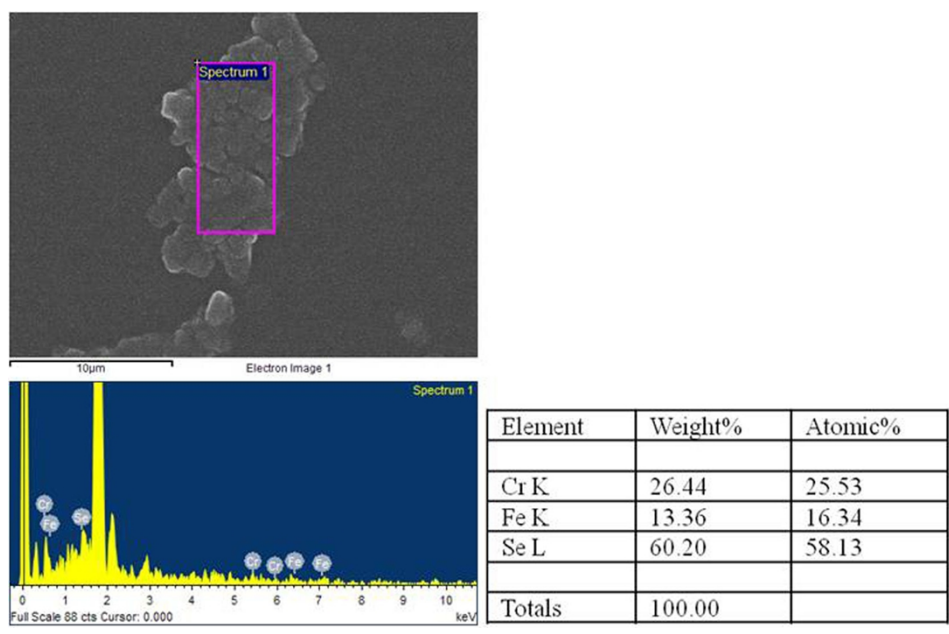

Figure S3: (a) FE-SEM image of OLA-capped NCs. (b) SEM-EDS spectra of  $\text{FeCr}_2\text{Se}_4$  NCs.

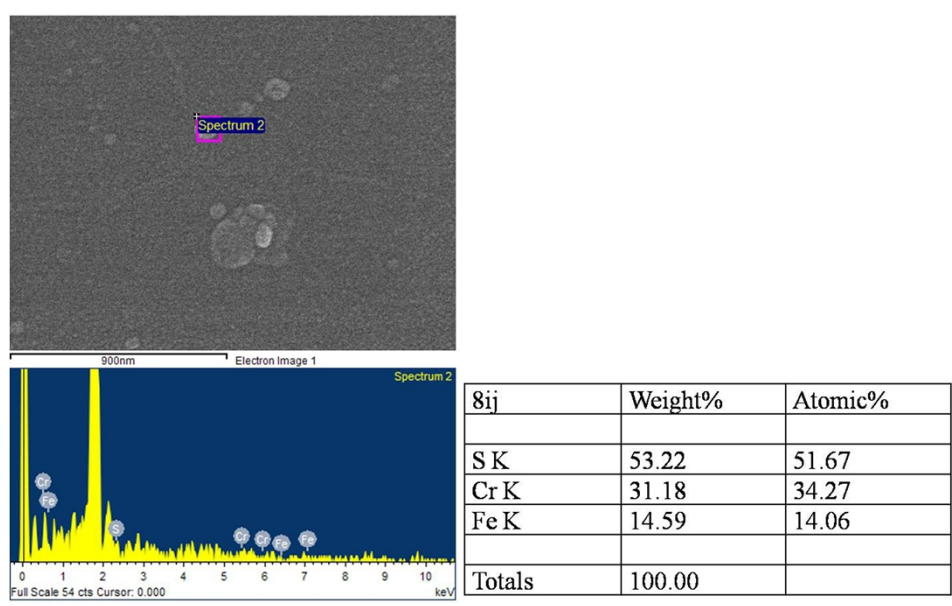

Figure S4: (a) FE-SEM image of OLA-capped NCs. (b) SEM-EDS spectra of  $\text{FeCr}_2\text{S}_4$  NCs.

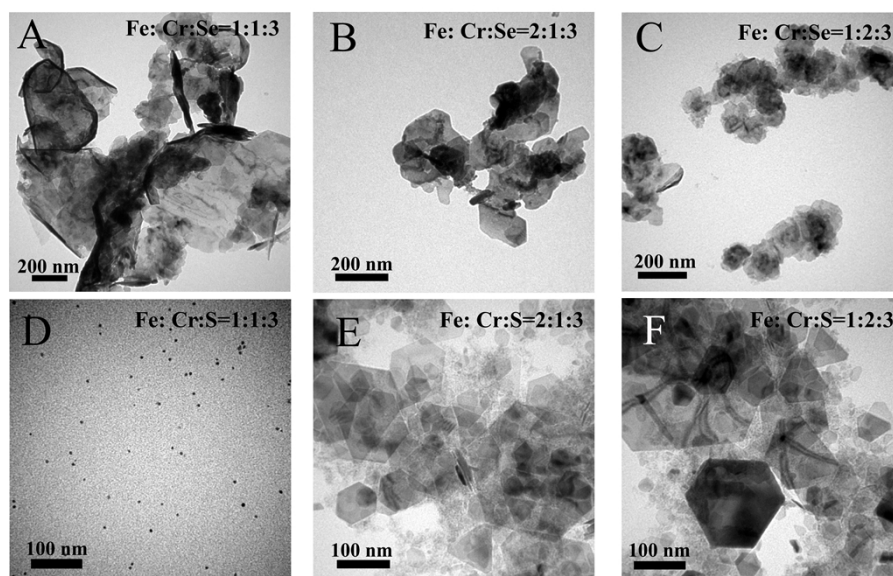

Figure S5. Representative TEM images of the products collected from the reaction with the same condition with different precursor molar ratio used in the synthesis of nanocrystals.

+

The TGA data of  $\text{FeCr}_2\text{Se}_4$  NCs (black) and  $\text{FeCr}_2\text{S}_4$  NCs (red) were obtained (see Figure S6). For the  $\text{FeCr}_2\text{Se}_4$  and  $\text{FeCr}_2\text{S}_4$  NCs, the onset of decomposition occurred at 260 °C and 254 °C, and the decomposition temperature of  $\text{FeCr}_2\text{Se}_4$  and  $\text{FeCr}_2\text{S}_4$  NCs were 670 °C and 750 °C with a mass loss of 32.5% and 22.5%, respectively.

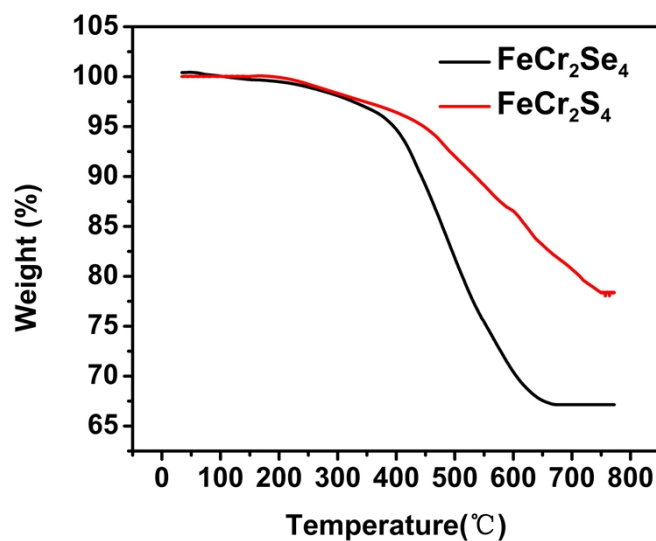

Figure S6: Thermal gravimetric analyses of  $\text{FeCr}_2\text{Se}_4$  and  $\text{FeCr}_2\text{S}_4$  NCs.

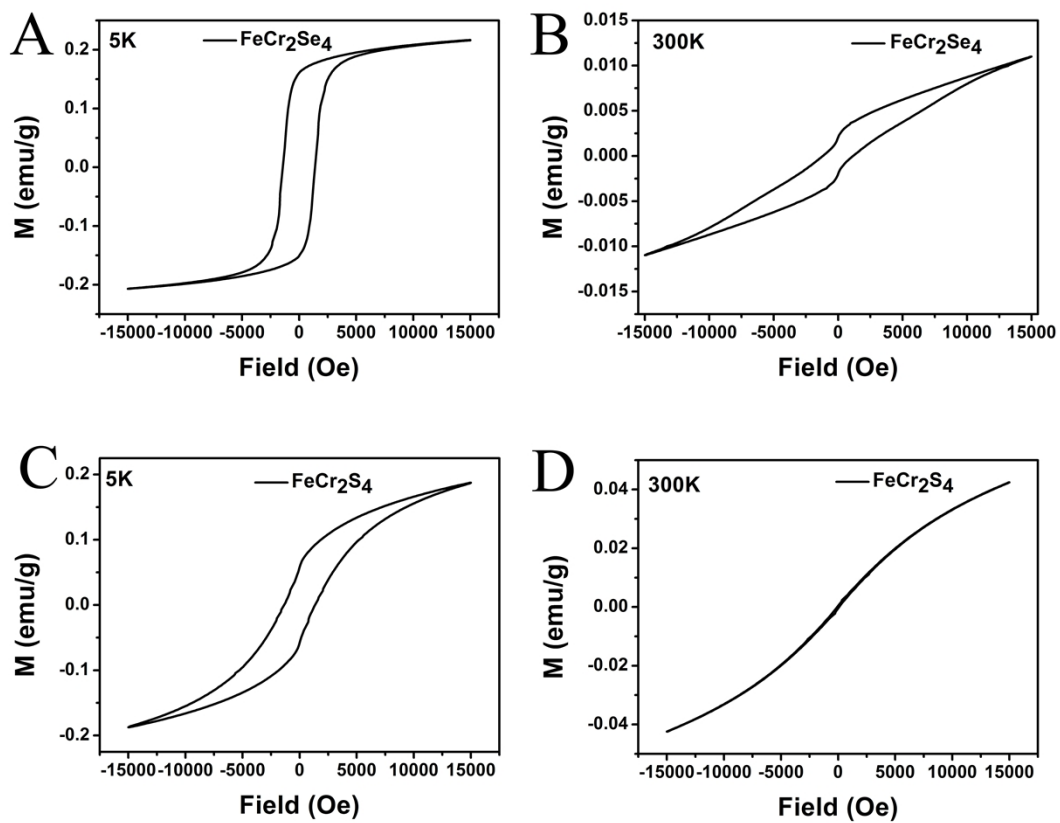

Figure S7 Magnetization ( $M$ ) as a function of field ( $H$ ) for  $\text{FeCr}_2\text{Se}_4$  and  $\text{FeCr}_2\text{S}_4$  NCs at (A, C) 5 K and (B, D) 300 K

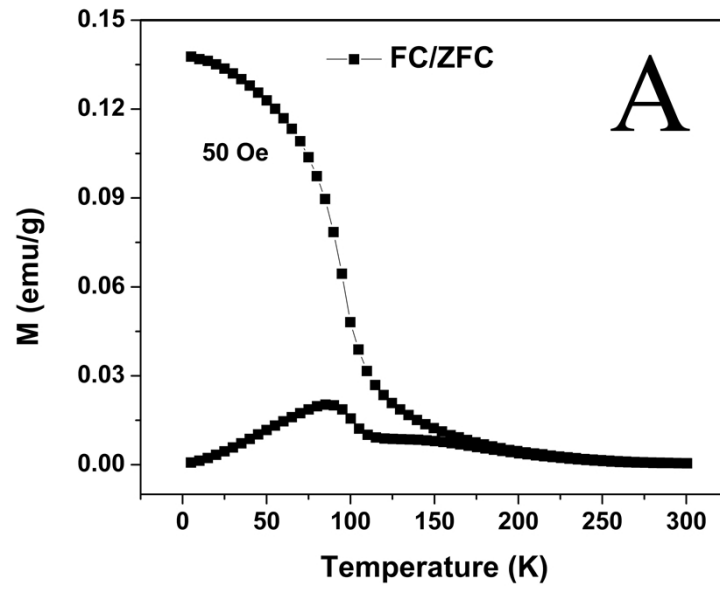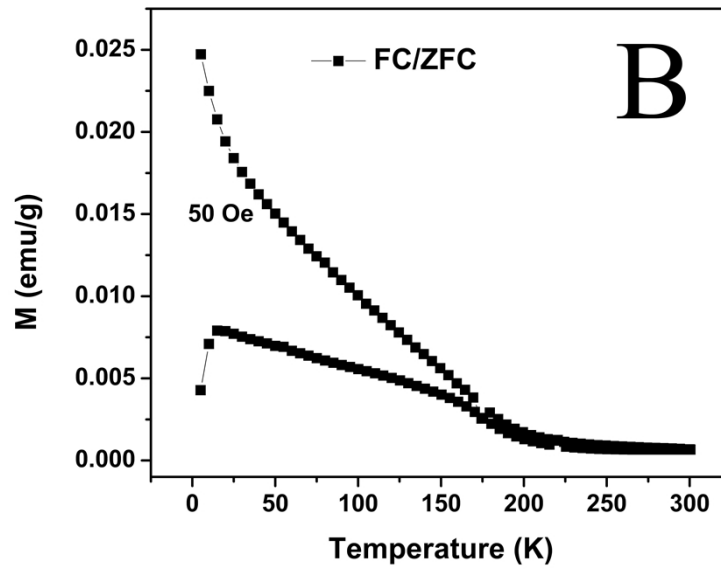

Figure S8: Magnetization (M) as a function of temperature for field-cooled (FC) and zero-field-cooled (ZFC) measurements at 50 Oe for FeCr<sub>2</sub>Se<sub>4</sub> (A) and FeCr<sub>2</sub>S<sub>4</sub> (B) respectively.



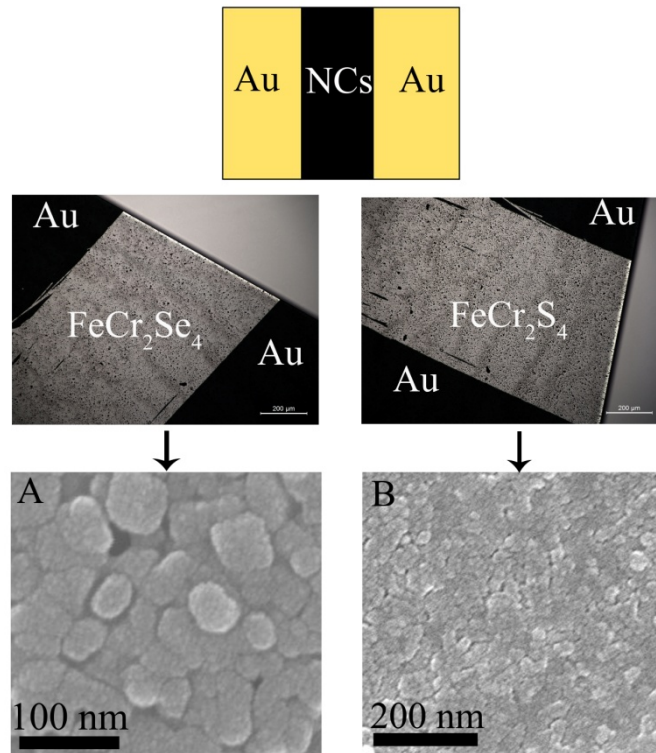

Figure S9: Simple fabrication schematic diagram(upper image) and two point Au electrode pad (insert scale bar is 200 micrometer); and SEM images of  $\text{FeCr}_2\text{Se}_4$  film (A) and  $\text{FeCr}_2\text{S}_4$  film (B), respectively.

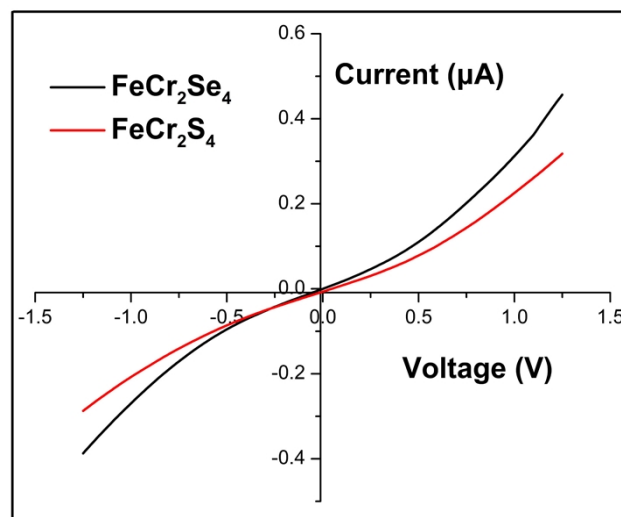

Figure S10: I-V curves of drop-casting films built from NCs, the range of voltage was from  $-1.25\text{eV}\sim 1.25\text{eV}$ .
